# Supplementary material for: Implementation of iMiDEV™, a new fully automated microfluidic platform for radiopharmaceutical production
Source: Royal Society of Chemistry journal article supplement (doi:10.1039/d1lc00148e), 2021-01-01
Supplement: d1lc00148e1.pdf [file d1lc00148e1.pdf]

Electronic Supplementary Information (ESI)

## Implementation of iMiDEV, a new fully automated microfluidic platform for radiopharmaceutical production

Olga Ovdiihuk,<sup>a</sup> Hemantha Mallapura,<sup>b</sup> Florian Pineda,<sup>c</sup> Virginie Hourtané,<sup>c</sup> Bengt Långström<sup>d</sup>, Christer Halldin<sup>b</sup>  
Sangram Nag<sup>b</sup>, Fatiha Maskali,<sup>a</sup> Gilles Karcher<sup>a,e</sup> and Charlotte Collet<sup>\*a,f</sup>

---

<sup>a.</sup> *NancycloTEP, Molecular imaging platform, 54500 Vandoeuvre les Nancy, France*  
<sup>b.</sup> *Department of Clinical Neuroscience, Center for Psychiatry Research, Karolinska Institutet and Stockholm County Council, Stockholm 17176, Sweden*  
<sup>c.</sup> *PMB Alcen, Route des Michels CD56, 13790 Peynier, France*  
<sup>d.</sup> *Department of Chemistry, Uppsala University, Sweden*  
<sup>e.</sup> *CHRU-Nancy, France*  
<sup>f.</sup> *Université de Lorraine, INSERM U1254 IADI, F-54500 Vandoeuvre les Nancy, France*

### Table of Contents

|                                                                                                                                                                                                                                                                                  |        |
|----------------------------------------------------------------------------------------------------------------------------------------------------------------------------------------------------------------------------------------------------------------------------------|--------|
| <b>Table S1.</b> Dimensions of channels, mixers and reactors                                                                                                                                                                                                                     | p 2    |
| <b>Figure S1.</b> Location of holes for filling chambers with beads, pillars and pneumatic valves; top view of the cassette                                                                                                                                                      |        |
| <b>Figure S2.</b> Cassette and vials clamping system                                                                                                                                                                                                                             | p 3    |
| <b>Figure S3.</b> Schematic representation of the steps used for [ <sup>18</sup> F]NaF synthesis in R1 chamber                                                                                                                                                                   | p 4    |
| <b>Table S2.</b> Optimised sodium [ <sup>18</sup> F]fluoride synthesis data (n=16)                                                                                                                                                                                               | p 5    |
| <b>Figure S4.</b> Graphical representation of [ <sup>18</sup> F]NaF Radiochemical Yield vs concentration of initial radioactivity of Fluoride-18                                                                                                                                 | p 6    |
| <b>Figure S5.</b> Graphical representation of [ <sup>18</sup> F]NaF Radiochemical Yield vs the volume of initial radioactivity of Fluoride-18                                                                                                                                    | p 6    |
| <b>Figure S6.</b> Schematic representation of the steps used for [ <sup>18</sup> F]NaF synthesis in R3 chamber                                                                                                                                                                   | p 7    |
| <b>Figure S7.</b> Trap-release radioactivity curve obtained after [ <sup>18</sup> F]NaF synthesis on R3 chamber                                                                                                                                                                  | p 8    |
| <b>Figure S8.</b> Schematic representation of the steps used for double [ <sup>18</sup> F]NaF synthesis                                                                                                                                                                          | p 8-10 |
| <b>Figure S9.</b> CLI of activity distribution for [ <sup>18</sup> F]NaF synthesis on R3: a) Cerenkov image after <sup>18</sup> F-trapping on R3 (136 MBq); b) white light image of the cassette; c) merged Cerenkov and white light images after <sup>18</sup> F-trapping step. | p. 10  |
| <b>Figure S10.</b> CLI of residual activity distribution for [ <sup>18</sup> F]NaF synthesis on R1 (≤ 7 MBq, 3,7%): a) Cerenkov image after synthesis; b) white light image of the cassette; c) merged Cerenkov and white light images after completion of the synthesis.        | p. 10  |
| <b>Figure S11.</b> Gamma Ray spectre of [ <sup>18</sup> F]NaF                                                                                                                                                                                                                    | p 11   |
| <b>Figure S12.</b> Representative analytical radio-HPLC profile of [ <sup>18</sup> F]NaF synthesized on R1                                                                                                                                                                       | p 11   |

**Table S1.** Dimensions of channels, mixers and reactors

| Dimensions ( $\mu\text{m}$ ) | Big channels (grey) | Mixer channel (M1-M4) | Small channels (red) |
|------------------------------|---------------------|-----------------------|----------------------|
| Top opening                  | 600                 | 800                   | 200                  |
| Bottom opening               | 140                 | 320                   | 10                   |
| Height                       | 400                 | 400                   | 200                  |

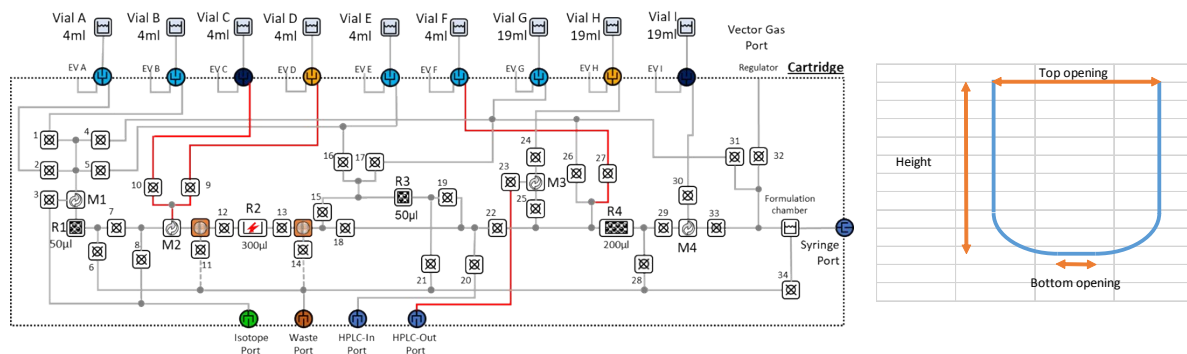

| Dimensions ( $\mu\text{m}$ ) | R1    | R2    | R3    | R4    |
|------------------------------|-------|-------|-------|-------|
| Width                        | 5500  | 35900 | 5500  | 8000  |
| Length                       | 10700 | 12000 | 10700 | 26700 |
| Depth                        | 1000  | 1000  | 1000  | 1000  |
| Volume ( $\mu\text{L}$ )     | 51    | 300   | 51    | 200   |

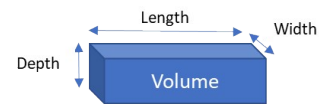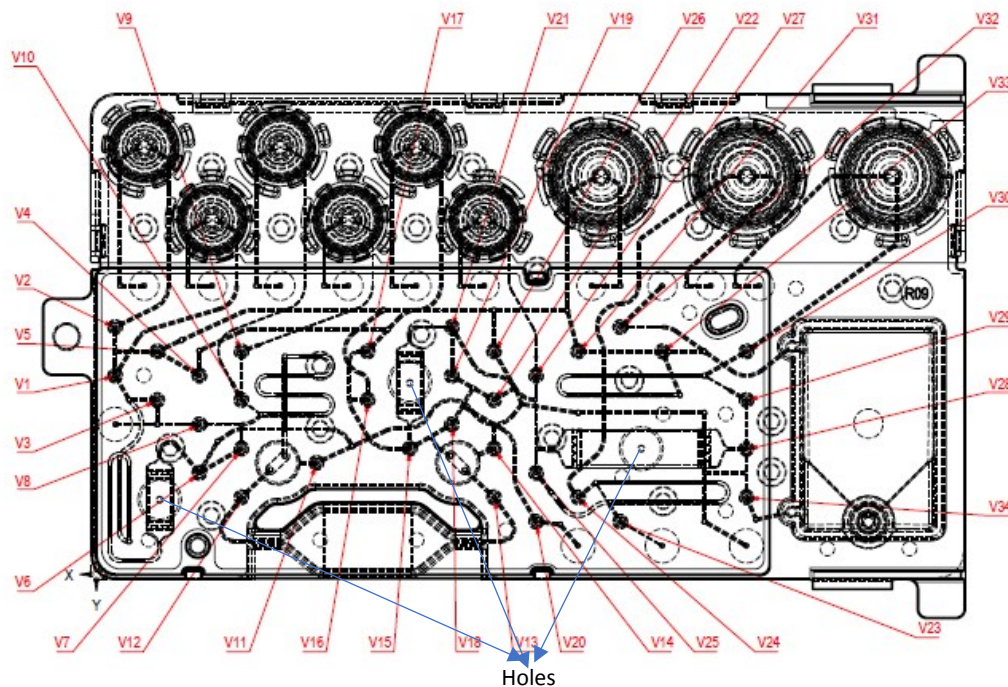

**Figure S1.** Location of holes for filling chambers with beads, pillars and pneumatic valves; top view of the cassette

a) Cassette presented

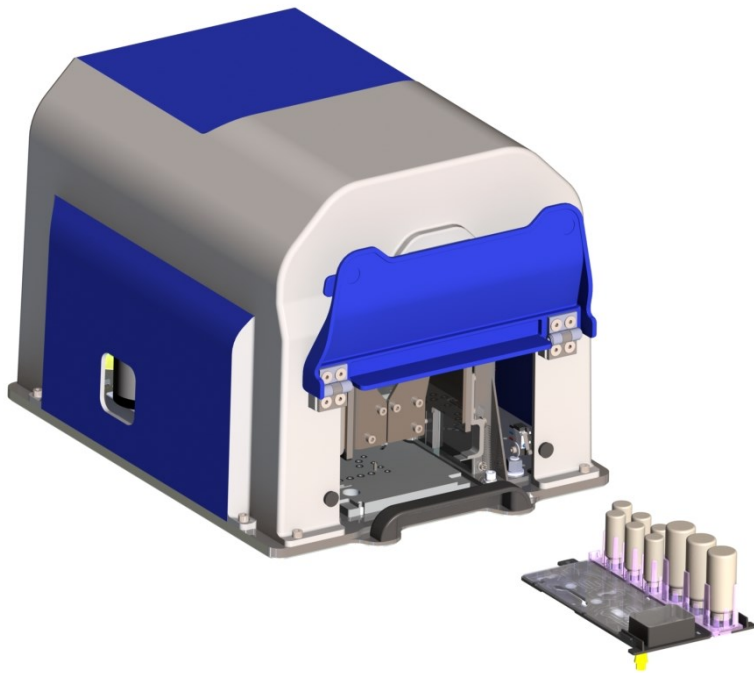

b) Cassette placed

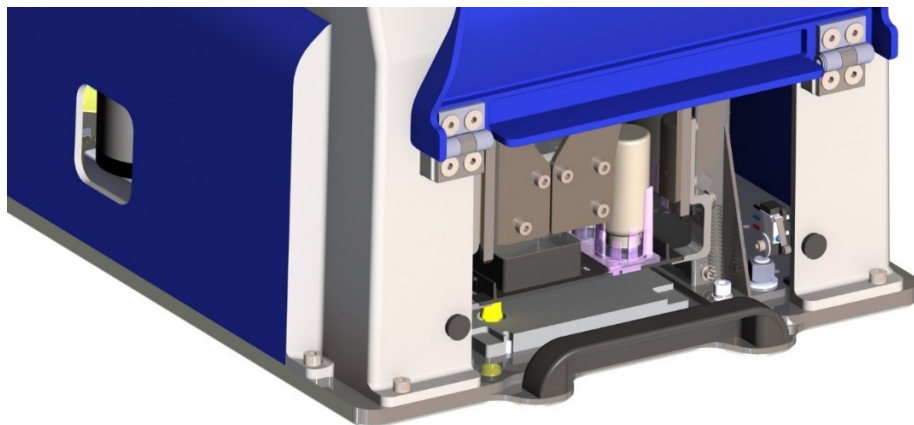

c) Cassette clamped

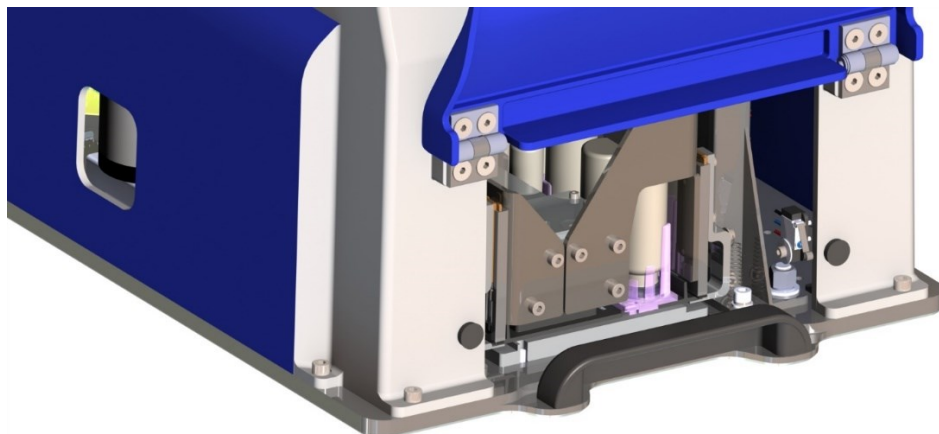

**Figure S2.** Cassette and vials clamping system; cassette external dimensions are 100x190x4 mm (l<sub>x</sub>wxh, h=77 mm with vial holder and vials).

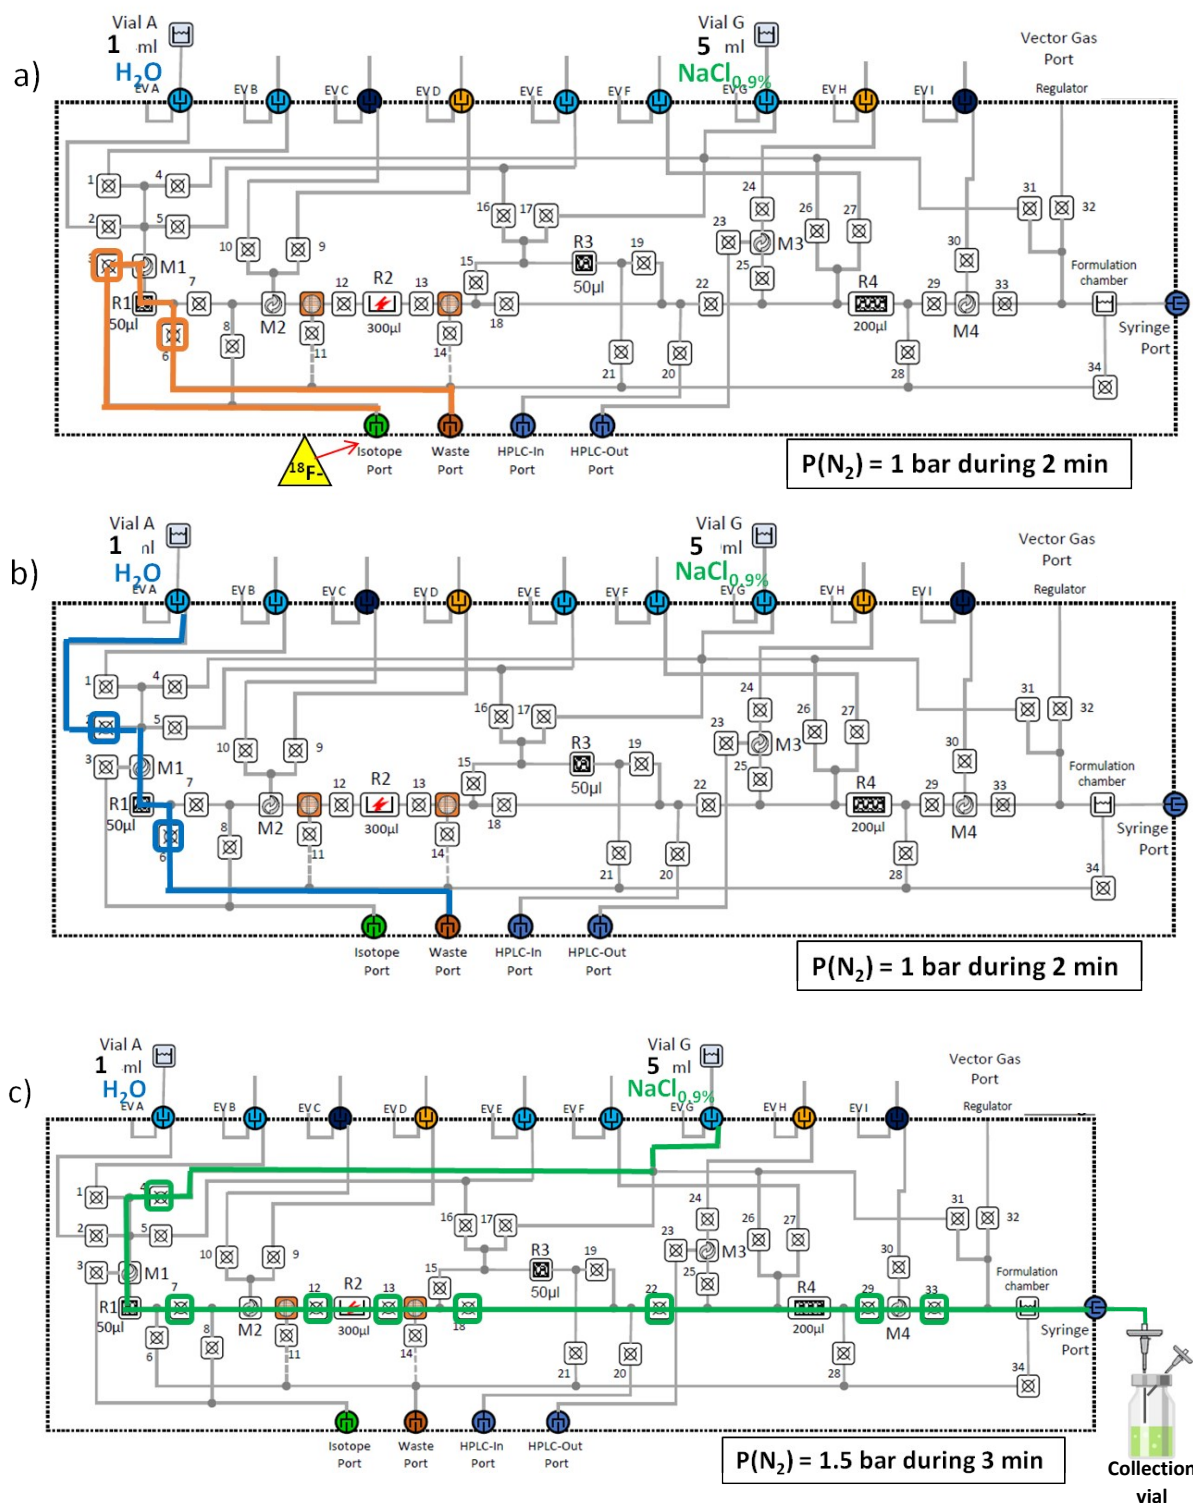

**Figure S3.** Schematic representation of the steps used for  $[^{18}\text{F}]\text{NaF}$  synthesis in R1 chamber: a) activity reception ; b) washing; c) elution and delivery of  $[^{18}\text{F}]\text{NaF}$ .

**Table S2.** Optimised sodium [<sup>18</sup>F]fluoride synthesis data (n=16)

| Entry | Chamber <sup>a</sup> | Target type | Initial activity of Fluoride-18 <sup>b</sup> , MBq | Volume of Fluoride-18, μL | C (Fluoride-18), MBq/mL | [ <sup>18</sup> F]NaF (dc to the SOS), MBq | RCY(dc), % |
|-------|----------------------|-------------|----------------------------------------------------|---------------------------|-------------------------|--------------------------------------------|------------|
| 1     | R1                   | Niobium     | 213                                                | 800                       | 266                     | 173                                        | 82         |
| 2     | R1                   | Niobium     | 215                                                | 1600                      | 134                     | 177                                        | 85         |
| 3     | R1                   | Niobium     | 209                                                | 850                       | 246                     | 161                                        | 78         |
| 4     | R1                   | Niobium     | 203                                                | 450                       | 451                     | 127                                        | 65         |
| 5     | R1                   | Niobium     | 198                                                | 500                       | 396                     | 132                                        | 69         |
| 6     | R1                   | Silver      | 186                                                | 1500                      | 124                     | 161                                        | 87         |
| 7     | R1                   | Niobium     | 214                                                | 600                       | 357                     | 158                                        | 75         |
| 8     | R1                   | Silver      | 1609                                               | 1500                      | 1073                    | 1378                                       | 86         |
| 9     | R1                   | Niobium     | 281                                                | 2500                      | 112                     | 247                                        | 91         |
| 10    | R1                   | Niobium     | 228                                                | 800                       | 285                     | 179                                        | 79         |
| 11    | R1                   | Niobium     | 225                                                | 700                       | 321                     | 167                                        | 76         |
| 12    | R3                   | Niobium     | 122                                                | 2500                      | 49                      | 106                                        | 88         |
| 13    | R3                   | Niobium     | 227                                                | 2000                      | 114                     | 200                                        | 88         |
| 14    | R3                   | Niobium     | 306                                                | 2150                      | 142                     | 259                                        | 88         |
| 15    | R3                   | Silver      | 574                                                | 2100                      | 273                     | 474                                        | 86         |
| 16    | R3                   | Silver      | 713                                                | 3300                      | 216                     | 598                                        | 84         |

<sup>a</sup> QMA-Cl beads reactivated with 0.9% NaCl; <sup>b</sup> at the SOS -start of synthesis; dc – decay corrected; RCY(dc)=  $\frac{[[^{18}\text{F}]\text{NaF (dc to the SOS)}]}{([[\text{Initial activity of F-18}] - [\text{Activity of Fluoride-18 in the source vial}]] - [\text{Activity of Fluoride-18 in the vial}])}$

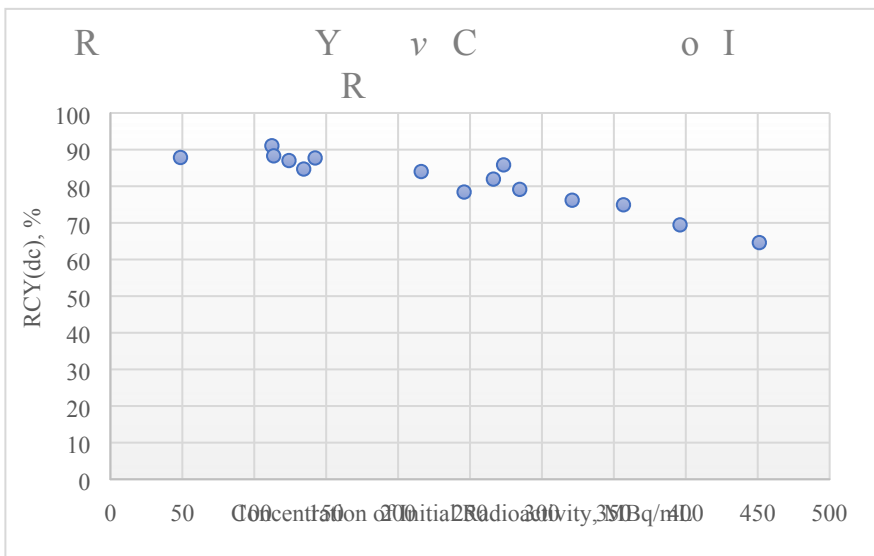

**Figure S4.** Graphical representation of [<sup>18</sup>F]NaF Radiochemical Yield vs concentration of initial radioactivity of Fluoride-18

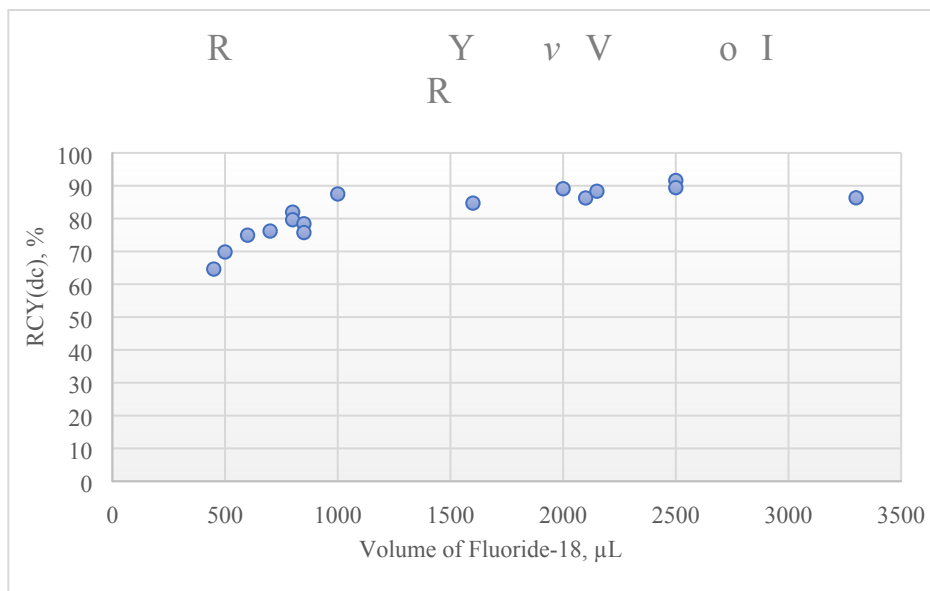

| Volume of Fluoride-18, μL | [ <sup>18</sup> F]NaF RCY(dc), % |
|---------------------------|----------------------------------|
| 450                       | 65                               |
| 500                       | 69                               |
| 600                       | 75                               |
| 700                       | 76                               |
| 800                       | 82                               |
| 800                       | 79                               |
| 850                       | 78                               |
| 1500                      | 87                               |
| 1500                      | 86                               |
| 1600                      | 85                               |
| 2000                      | 88                               |
| 2100                      | 86                               |
| 2150                      | 88                               |
| 2500                      | 88                               |
| 2500                      | 91                               |
| 3300                      | 84                               |

**Figure S5.** Graphical representation of [<sup>18</sup>F]NaF Radiochemical Yield vs the volume of initial radioactivity of Fluoride-18

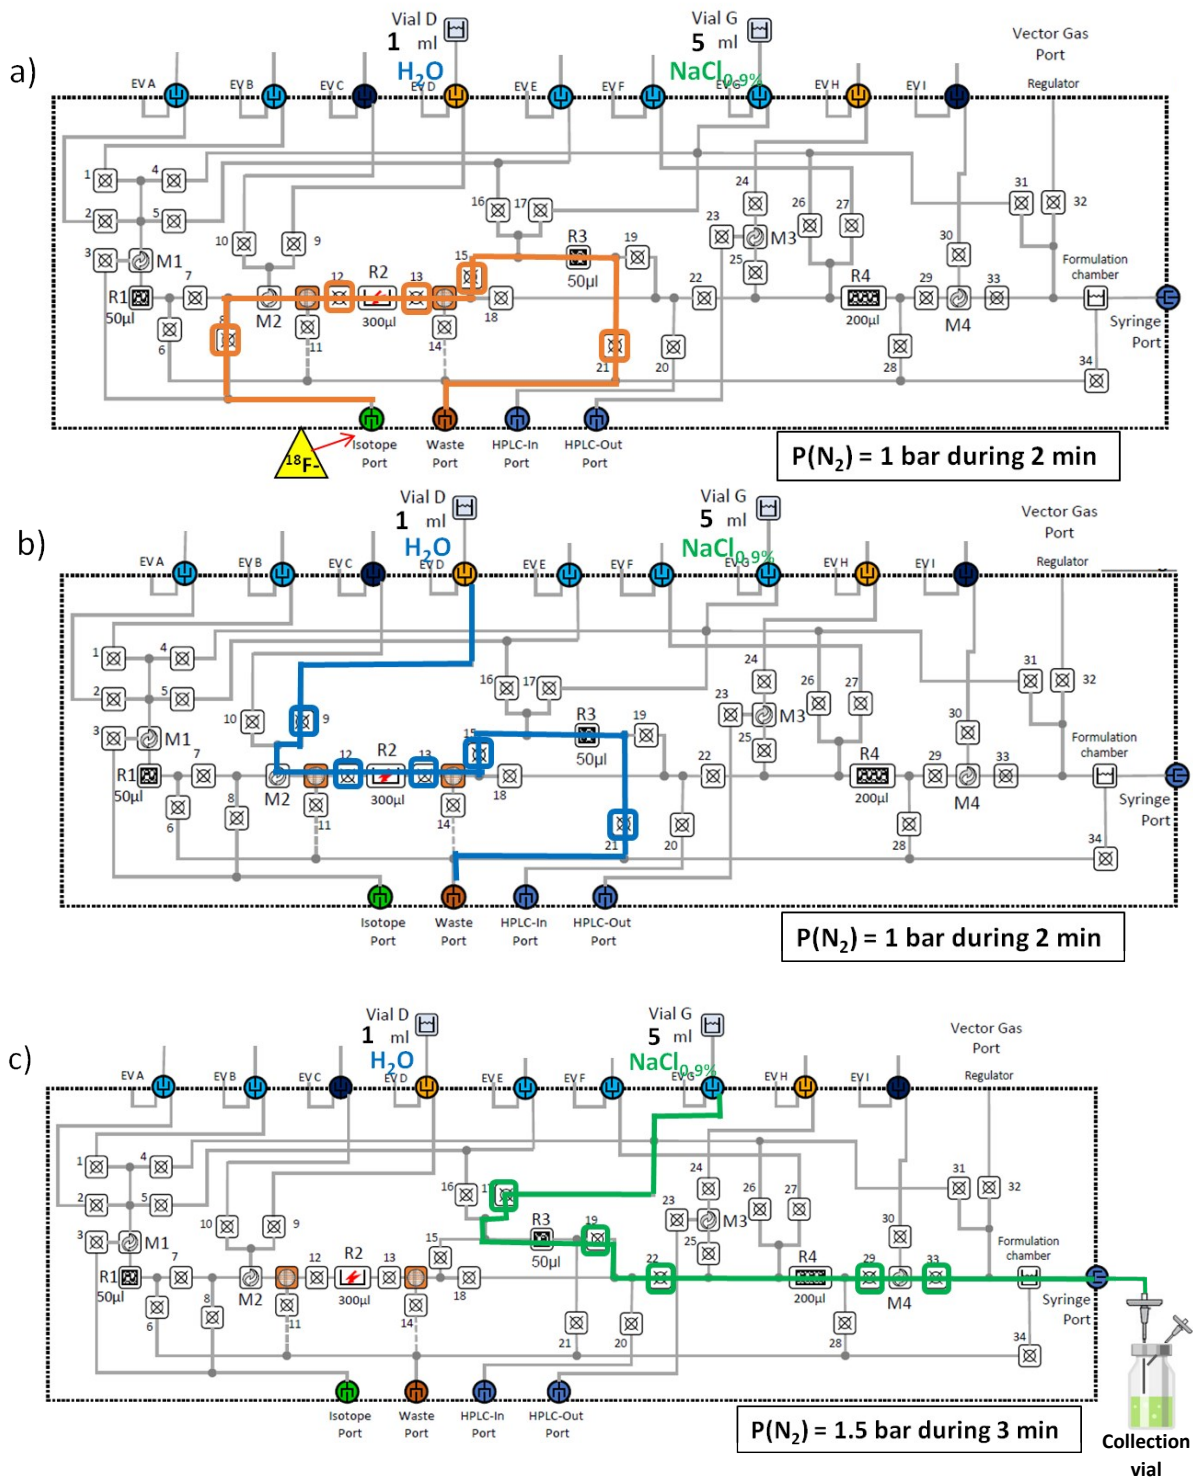

Figure S6. Schematic representation of the steps used for [<sup>18</sup>F]NaF synthesis in R3 chamber

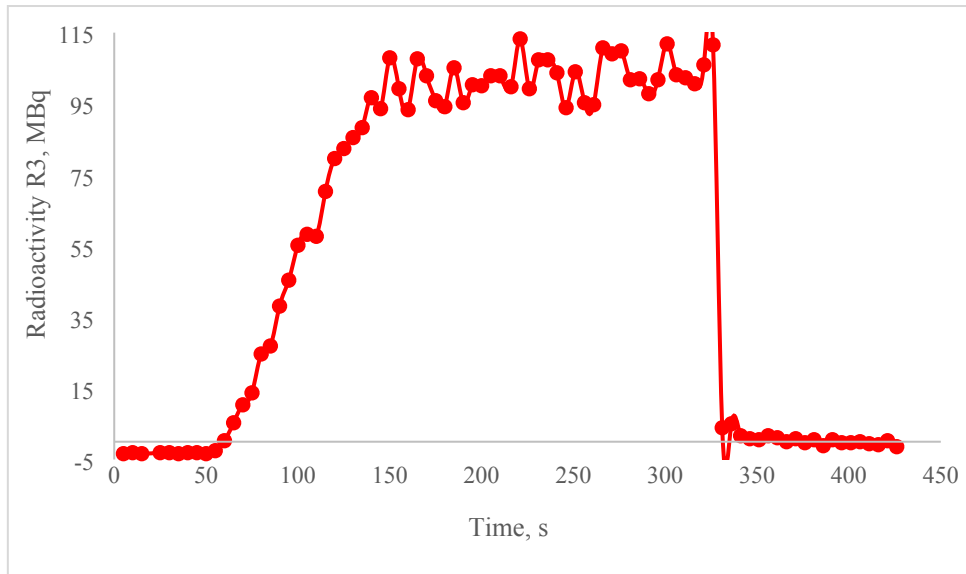

**Figure S7.** Trap-release radioactivity curve obtained after  $[^{18}\text{F}]\text{NaF}$  synthesis on R3 chamber; 105 MBq of activity was concentrated from 2 mL of irradiated target  $[^{18}\text{F}]\text{fluoride}$  solution

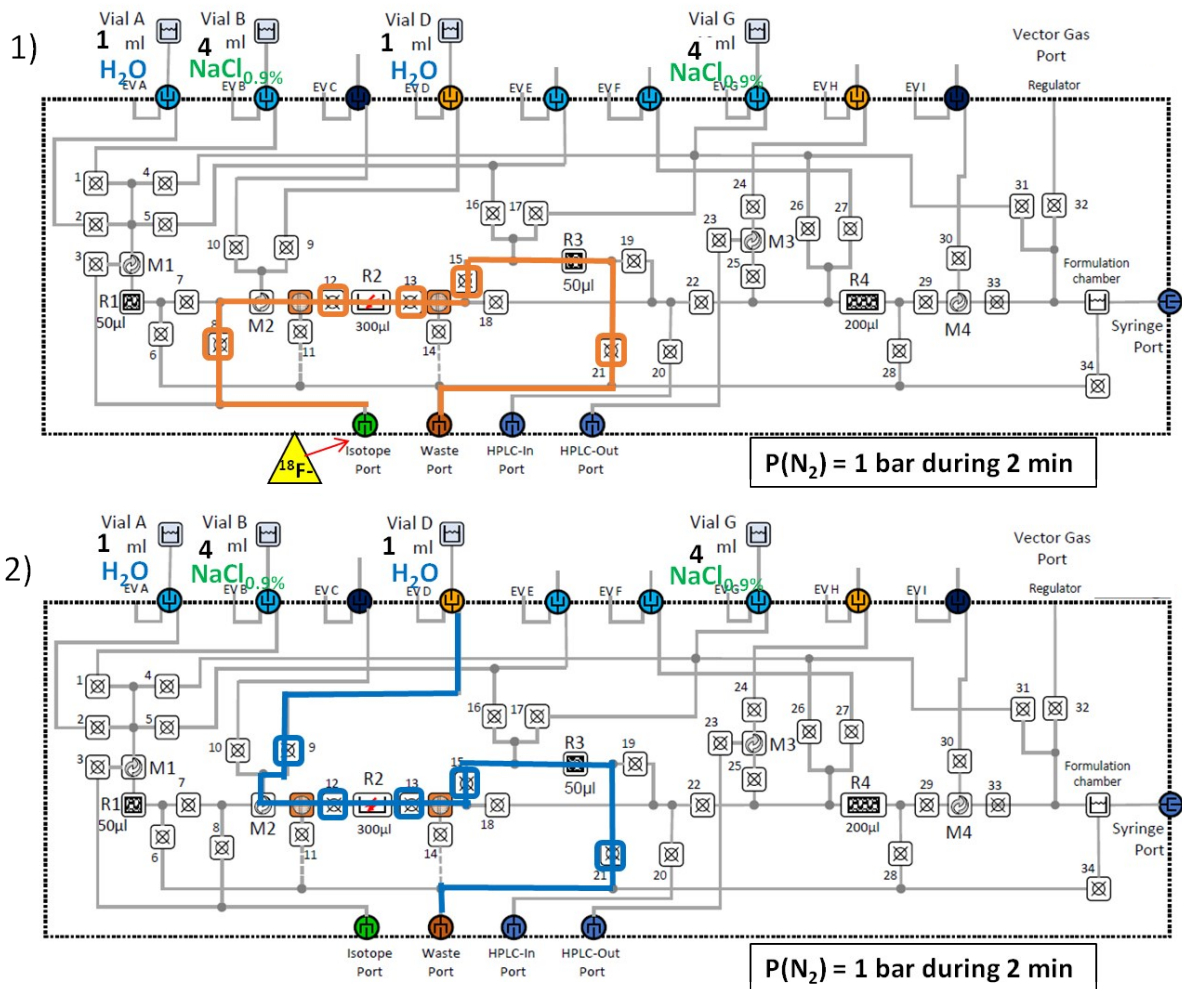



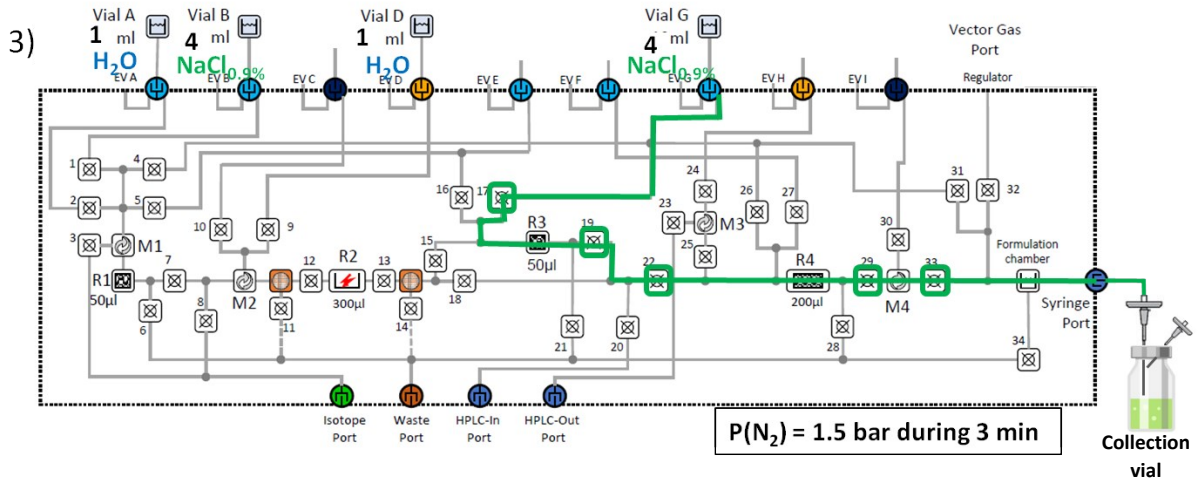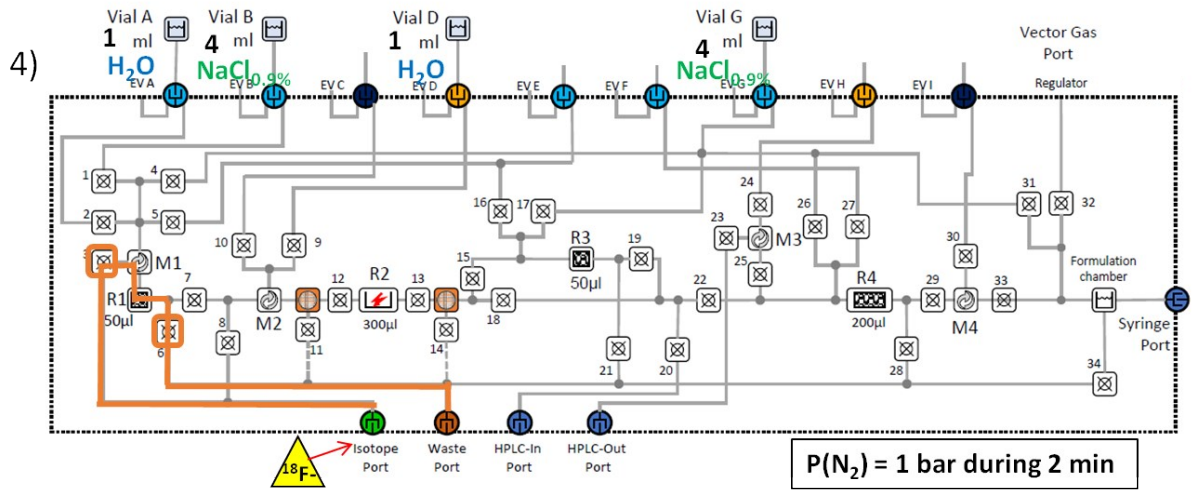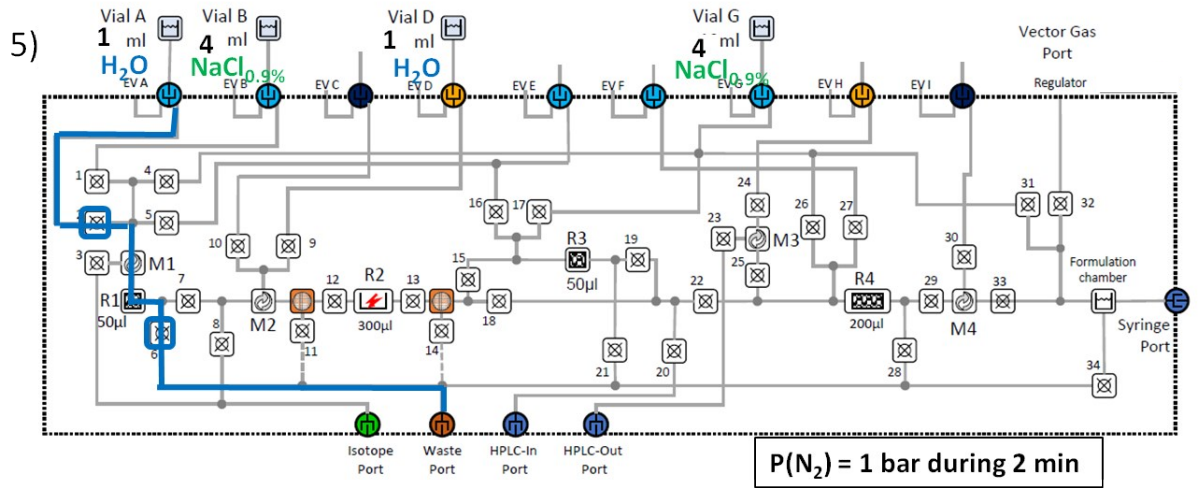

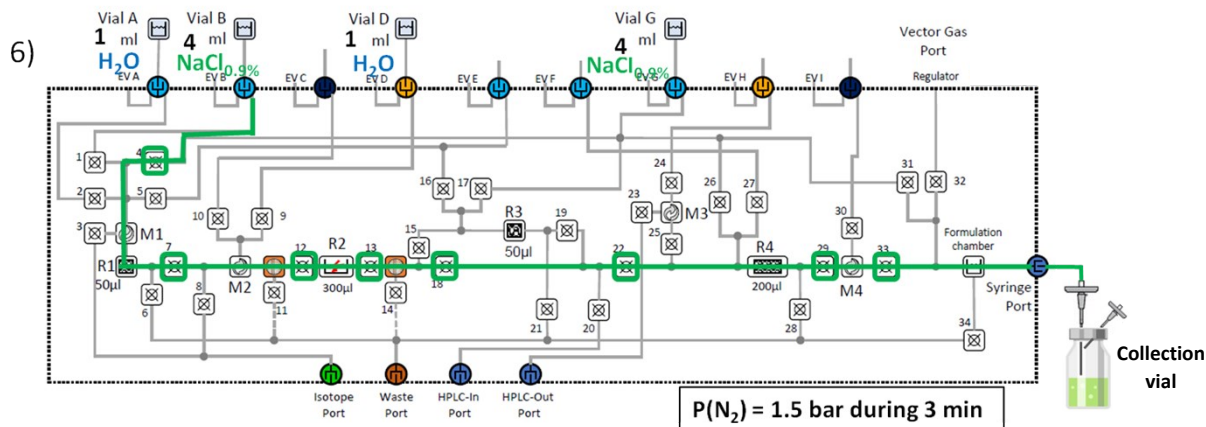

**Figure S8.** Schematic representation of the steps used for double  $[^{18}\text{F}]\text{NaF}$  synthesis on R3 followed by R1: 1) activity reception: the fluoride-18 solution is transferred into injection port of the cassette and trapped on the QMA-Cl in chamber R3; 2) washing of R3 with sterile distilled water; 3) elution of fluoride-18 from R3 with 0,9% NaCl and a final  $[^{18}\text{F}]\text{NaF}$  delivery from the formulation chamber to the collection vial; 4) activity reception: the fluoride-18 solution is transferred into injection port of the cassette and trapped on the QMA-Cl in chamber R1; 5) washing of R1 with sterile distilled water; 6) elution of fluoride-18 from R1 with 0,9% NaCl and a final  $[^{18}\text{F}]\text{NaF}$  delivery from the formulation chamber to the collection vial.

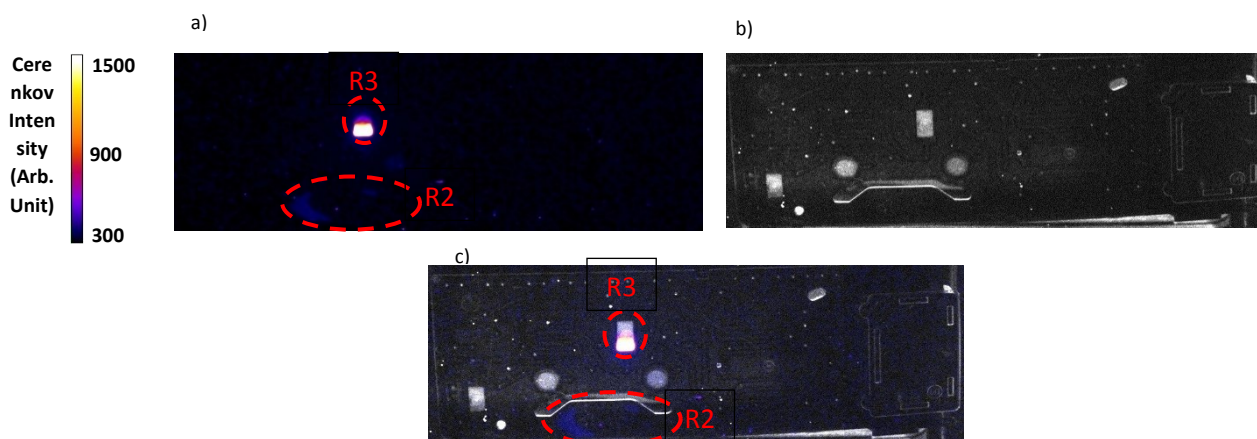

**Figure S9.** CLI of activity distribution for  $[^{18}\text{F}]\text{NaF}$  synthesis on R3: a) Cerenkov image after  $^{18}\text{F}$ -trapping on R3 (136 MBq) showing residual activity in R2; b) white light image of the top of the cassette; c) merged Cerenkov and white light images after  $^{18}\text{F}$ -trapping step.

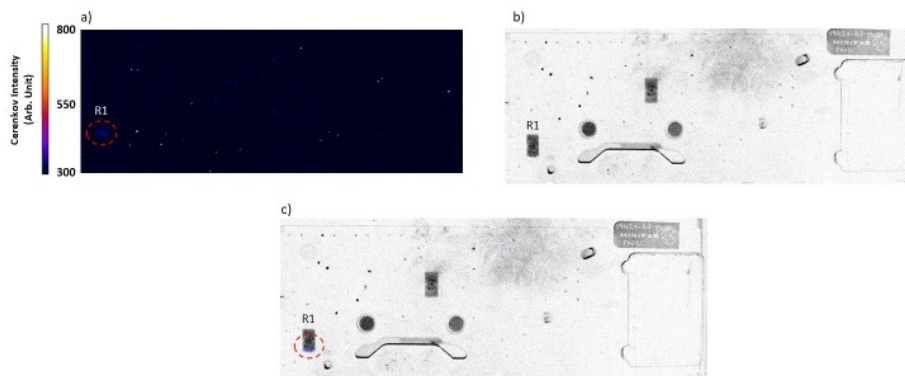

**Figure S10.** CLI of residual activity distribution for  $[^{18}\text{F}]\text{NaF}$  synthesis on R1 ( $\leq 7$  MBq, 3,7%): a) Cerenkov image after synthesis; b) white light image of the top of the cassette; c) merged Cerenkov and white light images after completion of the synthesis.

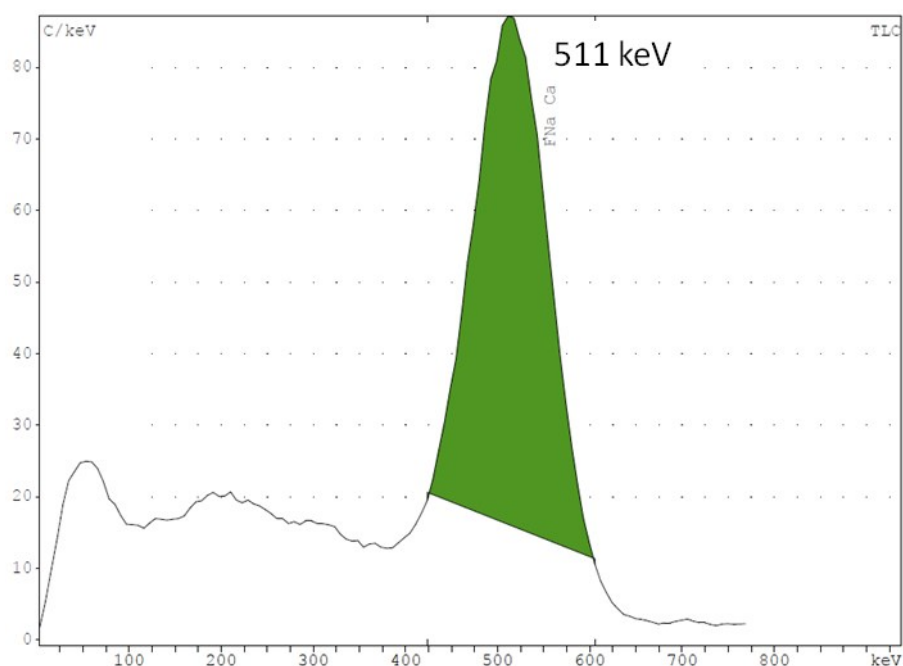

**Figure S11.** Gamma Ray spectrum of [<sup>18</sup>F]NaF

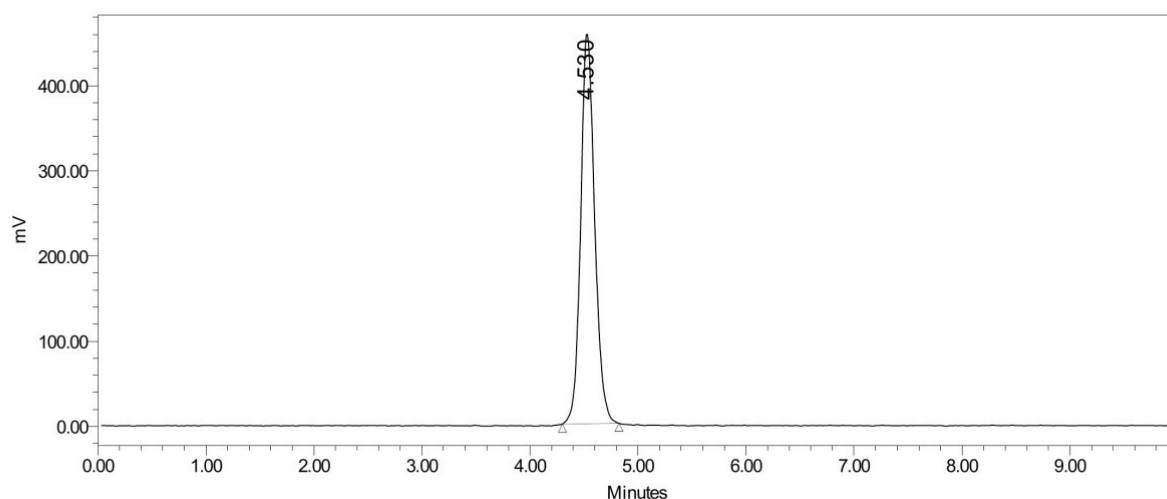

Channel: eSATIN-Ch1; Processed Channel: Channel 1; Result Id: 6833; Processing Method: NaF

**Processed Channel Descr.: Channel 1**

|   | Processed Channel Descr. | RT    | Area    | % Area | Height |
|---|--------------------------|-------|---------|--------|--------|
| 1 | Channel 1                | 4.530 | 4101106 | 100.00 | 457547 |

**Figure S12.** Representative analytical radio-HPLC profile of [<sup>18</sup>F]NaF synthesized on R1;  $V_{inj.}$ =20  $\mu$ L,  $t_r$ =4.5 min, Dionex™ CarboPac™ PA10 (4×250 mm) from Thermo Scientific™ ; 0.1 M sodium hydroxide solution at 1 mL/min.
